# Supplementary material for: Consequences of life history switch point plasticity for juvenile morphology and locomotion in theTúngara frog
Source: PeerJ journal article supplement (doi:10.7717/peerj.1268), 2015-09-22
Supplement: Supp2-_PRISMA_2009_Flow_Diagram_Charbonnier.pdf [file Supp2-_PRISMA_2009_Flow_Diagram_Charbonnier.pdf]

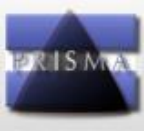

## PRISMA 2009 Flow Diagram

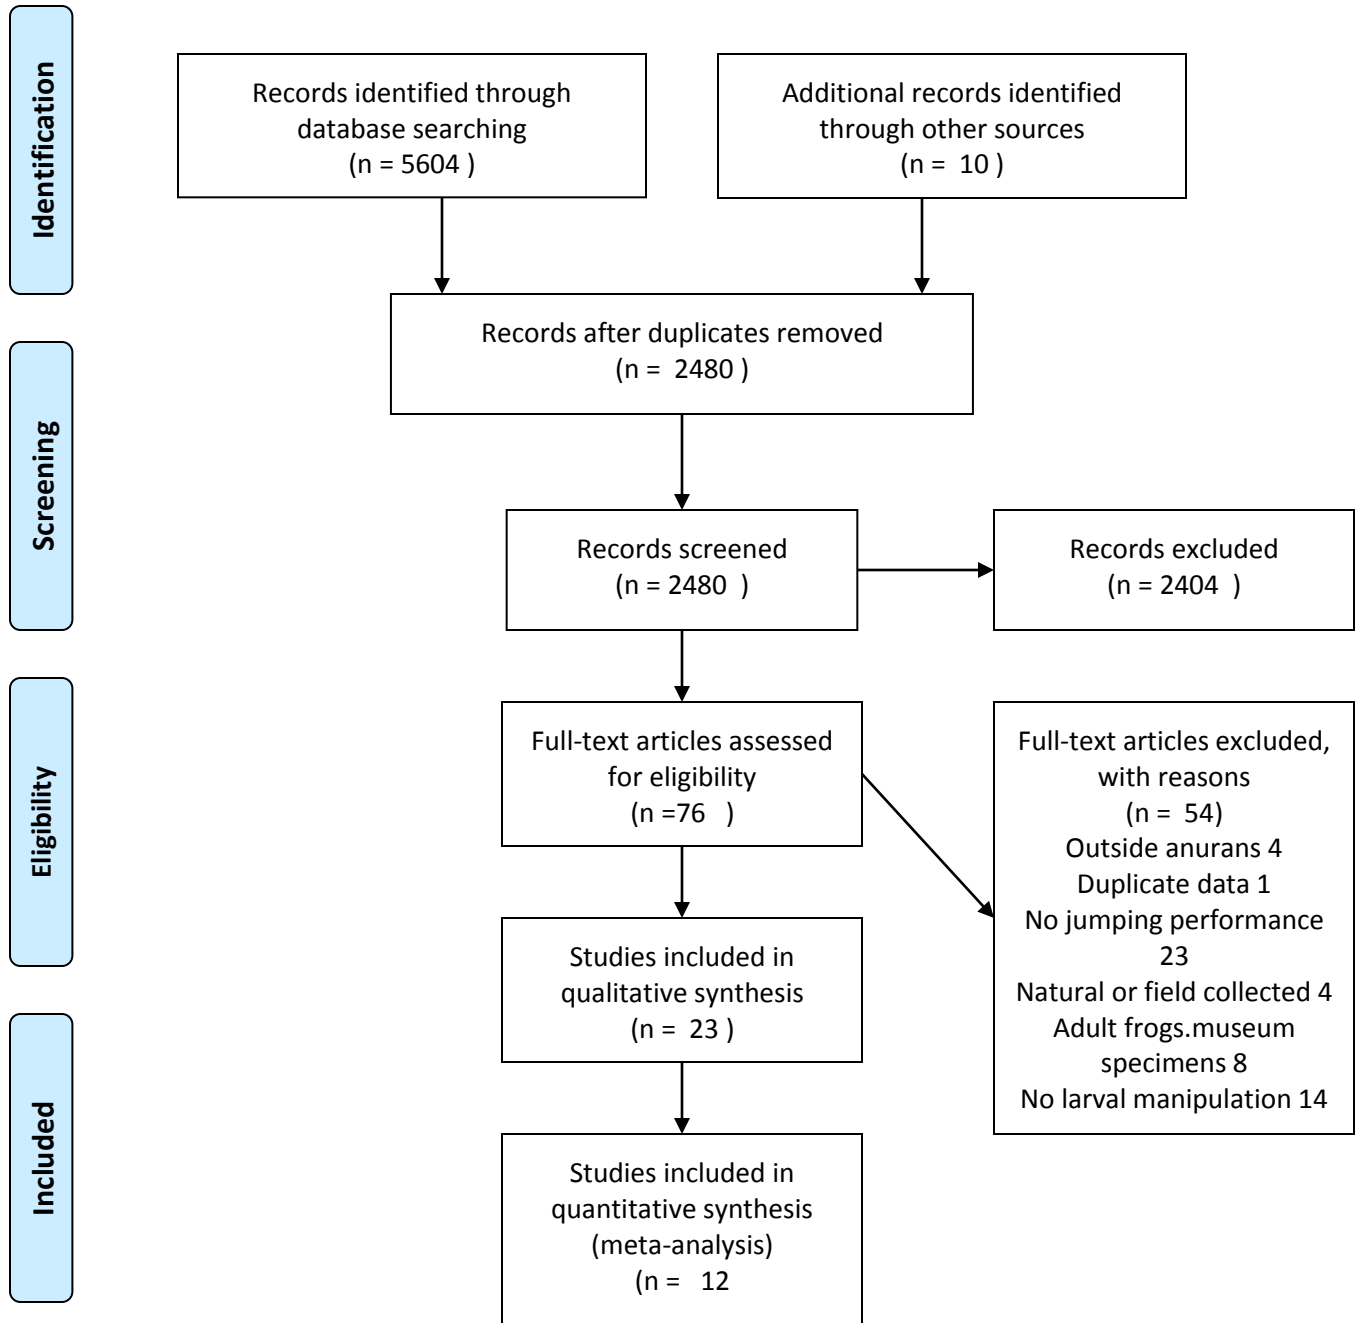

From: Moher D, Liberati A, Tetzlaff J, Altman DG, The PRISMA Group (2009). Preferred Reporting Items for Systematic Reviews and Meta-Analyses: The PRISMA Statement. PLoS Med 6(6): e1000097. doi:10.1371/journal.pmed1000097

For more information, visit [www.prisma-statement.org](http://www.prisma-statement.org).
